# Supplementary material for: Effect of single electrons on the excited state dynamics of rod-shaped Au25 nanoclusters
Source: Royal Society of Chemistry journal article supplement (doi:10.1039/d1nr06208e), 2021-01-01
Supplement: d1nr06208e1.pdf [file d1nr06208e1.pdf]

## *Electronic Supplementary Information*

### **Effect of Single Electron on the Excited State Dynamics of Rod-Shaped Au<sub>25</sub> Nanoclusters**

Jie Kong,<sup>1</sup> Dayujia Huo,<sup>2</sup> Jialong Jie,<sup>2</sup> Yanzhen Wu,<sup>1</sup> Yan Wan,<sup>2</sup> Yongbo Song,<sup>3</sup> Meng Zhou<sup>1\*</sup>

<sup>1</sup>*Hefei National Laboratory for Physical Sciences at the Microscale, University of Science and Technology of China, Hefei, Anhui 230026, China*

<sup>2</sup>*College of Chemistry, Beijing Normal University, Beijing 100875, China*

<sup>3</sup>*School of Biomedical Engineering, Research and Engineering Center of Biomedical Materials, Anhui Medical University, Hefei, Anhui 230032, China*

\*To whom correspondence should be addressed. Email: [mzhou88@ustc.edu.cn](mailto:mzhou88@ustc.edu.cn)

#### **Experimental Section**

**Synthesis of Au Nanoclusters** The synthesis of two rod-shaped Au<sub>25</sub> nanoclusters followed the procedures reported previously.<sup>1</sup>

**Steady State Absorption Measurements** The UV-vis absorption of two rod-shaped Au<sub>25</sub> nanoclusters were collected with an Agilent HP8453 diode array spectrometer. The two nanoclusters were dissolved in CH<sub>2</sub>Cl<sub>2</sub> for steady state absorption measurements.

**Transient Absorption Spectroscopy** The nanosecond transient absorption measurements were performed using nanosecond flash photolysis setup Edinburgh LP920 spectrometer (Edinburgh Instruments Ltd.), combined with a Nd:YAG laser at 355 nm (Surelite II, Continuum Inc.).

The femtosecond transient absorption measurements were performed on a commercial spectrometer (Harpia-TA, Light Conversion) as described previously.<sup>2</sup> In the isotropy TA measurements, the pump and probe pulse were set to magic angle (54.7). In the anisotropy TA measurements, the signal was calculated by :

$$r(t) = \frac{I_{VV} - I_{VH}}{I_{VV} + 2I_{VH}} \quad (1)$$

where  $I_{VV}$  and  $I_{VH}$  represent the TA signals with probe parallel and vertical to the pump, respectively. Global analysis on the TA data was performed using Glotaran followed the procedure reported previously. The UV-vis absorption spectra remain the same before and after the transient absorption measurements, indicating little decomposition of the nanocluster. All the transient absorption data was collected in CH<sub>2</sub>Cl<sub>2</sub>.

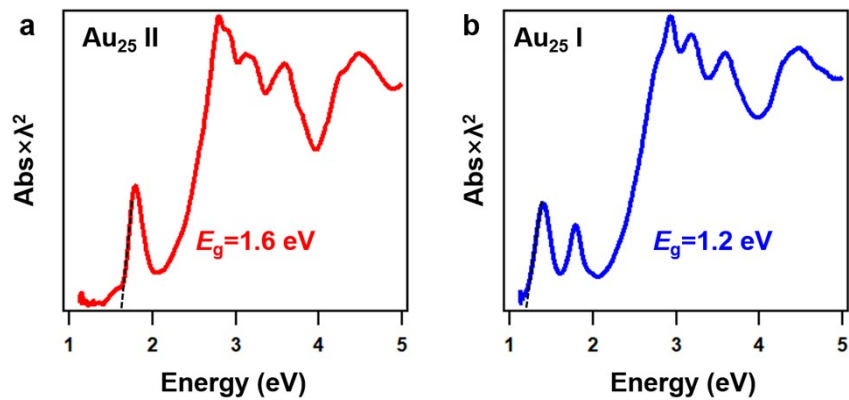

**Figure S1.** Steady state absorption spectra of (a)  $\text{Au}_{25}$  II and (b)  $\text{Au}_{25}$  I nanoclusters in energy scale. The band gaps of two nanoclusters are determined by extrapolating the absorbance to zero (black dashed lines).

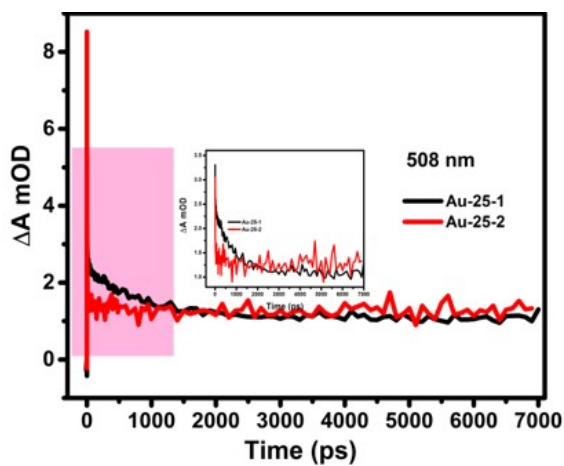

**Figure S2.** Comparison of transient absorption (TA) kinetics probed at 508 nm of two rod-shaped  $\text{Au}_{25}$  nanoclusters. The inset shows the zoom in of TA kinetics of two nanoclusters.

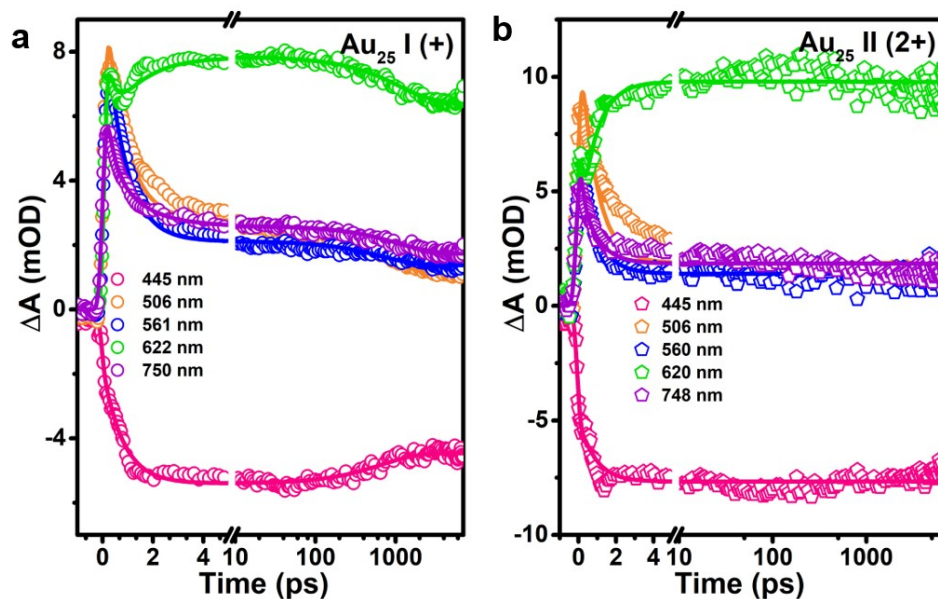

**Figure S3.** TA kinetic traces at selected probe wavelengths and corresponding fits from global analysis of (a)  $\text{Au}_{25}$  I and (b)  $\text{Au}_{25}$  II.

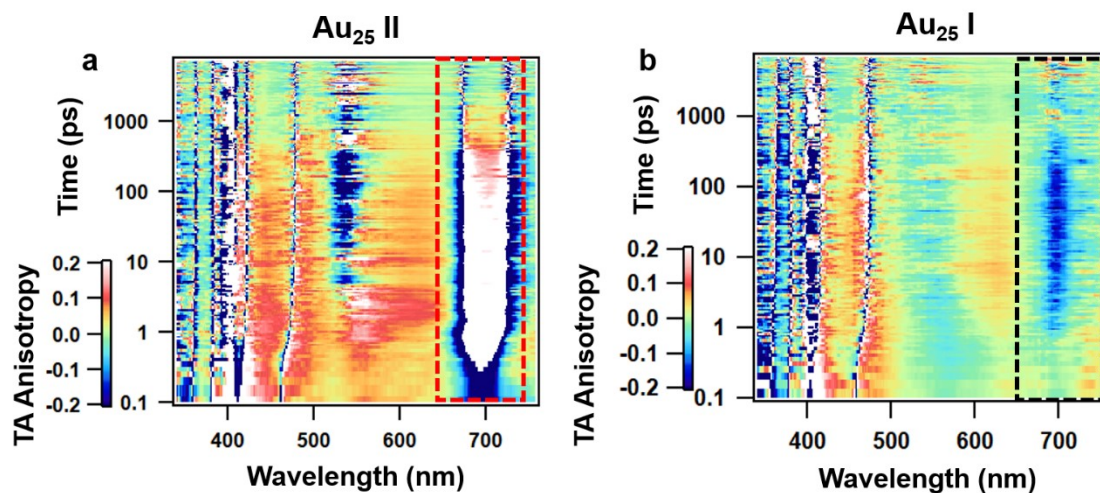

**Figure S4.** Transient absorption anisotropy (TAA) data map of  $\text{Au}_{25}$  II (a) and  $\text{Au}_{25}$  I (b) NCs with excitation. Dashed lines indicate the GSB positions around 700 nm of two NCs.

### References.

- (1) Song, Y.; Jin, S.; Kang, X.; Xiang, J.; Deng, H.; Yu, H.; Zhu, M., How a Single Electron Affects the Properties of the “Non-Superatom”  $\text{Au}_{25}$  Nanoclusters. *Chem. Mater.* **2016**, *28*, 2609-2617.
- (2) Huo, D.; Peng, Q.; Xu, T.; Wang, X.; Wang, X.; Xia, A.; Lu, R.; Cui, G.; Wan, Y., Intramolecular Energy Transfer in a Series of Star-Shaped Molecules with a Central Porphyrin Core and Four Oligocarbazole Arms. *J. Phys. Chem. C* **2020**, *124*, 27356-27365.
